# Supplementary material for: Virulence Determinants of Colistin-Resistant K. pneumoniae High-Risk Clones
Source: MDPI journal article supplement (doi:10.3390/biology10050436), 2021-05-14
Supplement: s1 [file s1]

# Virulence Determinants of Colistin-Resistant *K.pneumoniae* High-Risk Clones

May 11, 2021

Summary table

| ##                  | Total              | ST101             | ST395             | Other STs        | p (ST101) | p (ST395) |
|---------------------|--------------------|-------------------|-------------------|------------------|-----------|-----------|
| ## 30-day mortality | " 72/142 (50.7%)"  | " 46/80 (57.5%)"  | " 12/16 (75.0%)"  | " 14/46 (30.4%)" | " 0.005"  | " 0.003"  |
| ## Bacteremia       | " 61/142 (43.0%)"  | " 33/80 (41.2%)"  | " 10/16 (62.5%)"  | " 18/46 (39.1%)" | " 0.852"  | " 0.147"  |
| ## Carbapenem res.  | " 135/142 (95.1%)" | " 78/80 (97.5%)"  | " 16/16 (100.0%)" | " 41/46 (89.1%)" | " 0.098"  | " 0.315"  |
| ## Colistin exp.    | " 69/142 (48.6%)"  | " 36/80 (45.0%)"  | " 5/16 (31.2%)"   | " 28/46 (60.9%)" | " 0.098"  | " 0.048"  |
| ## Colistin tar.    | " 55/142 (38.7%)"  | " 31/80 (38.8%)"  | " 4/16 (25.0%)"   | " 20/46 (43.5%)" | " 0.707"  | " 0.242"  |
| ## Comorbidity      | " 49/142 (34.5%)"  | " 27/80 (33.8%)"  | " 4/16 (25.0%)"   | " 18/46 (39.1%)" | " 0.567"  | " 0.375"  |
| ## Emp. carbapenem  | " 68/141 (48.2%)"  | " 39/80 (48.8%)"  | " 3/15 (20.0%)"   | " 26/46 (56.5%)" | " 0.461"  | " 0.018"  |
| ## Emp. colistin    | " 42/141 (29.8%)"  | " 20/80 (25.0%)"  | " 1/16 (6.2%)"    | " 21/45 (46.7%)" | " 0.017"  | " 0.005"  |
| ## FimH             | " 136/142 (95.8%)" | " 79/80 (98.8%)"  | " 16/16 (100.0%)" | " 41/46 (89.1%)" | " 0.024"  | " 0.315"  |
| ## FyuA             | " 138/142 (97.2%)" | " 79/80 (98.8%)"  | " 15/16 (93.8%)"  | " 44/46 (95.7%)" | " 0.553"  | " 1.000"  |
| ## Gender           | " 60/142 (42.3%)"  | " 34/80 (42.5%)"  | " 7/16 (43.8%)"   | " 19/46 (41.3%)" | " 1.000"  | " 1.000"  |
| ## ICU              | " 119/141 (84.4%)" | " 68/79 (86.1%)"  | " 15/16 (93.8%)"  | " 36/46 (78.3%)" | " 0.323"  | " 0.261"  |
| ## IutA             | " 10/142 (7.0%)"   | " 4/80 (5.0%)"    | " 1/16 (6.2%)"    | " 5/46 (10.9%)"  | " 0.285"  | " 1.000"  |
| ## K2Wzy            | " 60/142 (42.3%)"  | " 31/80 (38.8%)"  | " 9/16 (56.2%)"   | " 20/46 (43.5%)" | " 0.707"  | " 0.401"  |
| ## Kfu              | " 121/142 (85.2%)" | " 79/80 (98.8%)"  | " 15/16 (93.8%)"  | " 27/46 (58.7%)" | " 0.000"  | " 0.012"  |
| ## KPC              | " 2/142 (1.4%)"    | " 0/80 (0.0%)"    | " 0/16 (0.0%)"    | " 2/46 (4.3%)"   | " 0.131"  | " 1.000"  |
| ## MagA             | " 10/142 (7.0%)"   | " 6/80 (7.5%)"    | " 0/16 (0.0%)"    | " 4/46 (8.7%)"   | " 1.000"  | " 0.565"  |
| ## Mortality        | " 95/142 (66.9%)"  | " 61/80 (76.2%)"  | " 12/16 (75.0%)"  | " 22/46 (47.8%)" | " 0.002"  | " 0.082"  |
| ## mrkD             | " 136/142 (95.8%)" | " 79/80 (98.8%)"  | " 15/16 (93.8%)"  | " 42/46 (91.3%)" | " 0.059"  | " 1.000"  |
| ## NDM-1            | " 31/142 (21.8%)"  | " 3/80 (3.8%)"    | " 14/16 (87.5%)"  | " 14/46 (30.4%)" | " 0.000"  | " 0.000"  |
| ## Operation        | " 73/142 (51.4%)"  | " 40/80 (50.0%)"  | " 8/16 (50.0%)"   | " 25/46 (54.3%)" | " 0.712"  | " 0.780"  |
| ## OXA-48           | " 116/142 (81.7%)" | " 76/80 (95.0%)"  | " 5/16 (31.2%)"   | " 35/46 (76.1%)" | " 0.003"  | " 0.002"  |
| ## RmpA             | " 116/142 (81.7%)" | " 71/80 (88.8%)"  | " 14/16 (87.5%)"  | " 31/46 (67.4%)" | " 0.005"  | " 0.194"  |
| ## VAP              | " 67/142 (47.2%)"  | " 44/80 (55.0%)"  | " 9/16 (56.2%)"   | " 14/46 (30.4%)" | " 0.009"  | " 0.079"  |
| ## WabG             | " 141/142 (99.3%)" | " 80/80 (100.0%)" | " 16/16 (100.0%)" | " 45/46 (97.8%)" | " 0.365"  | " 1.000"  |
| ## ybtS             | " 121/142 (85.2%)" | " 79/80 (98.8%)"  | " 15/16 (93.8%)"  | " 27/46 (58.7%)" | " 0.000"  | " 0.012"  |

Heatmap analysis

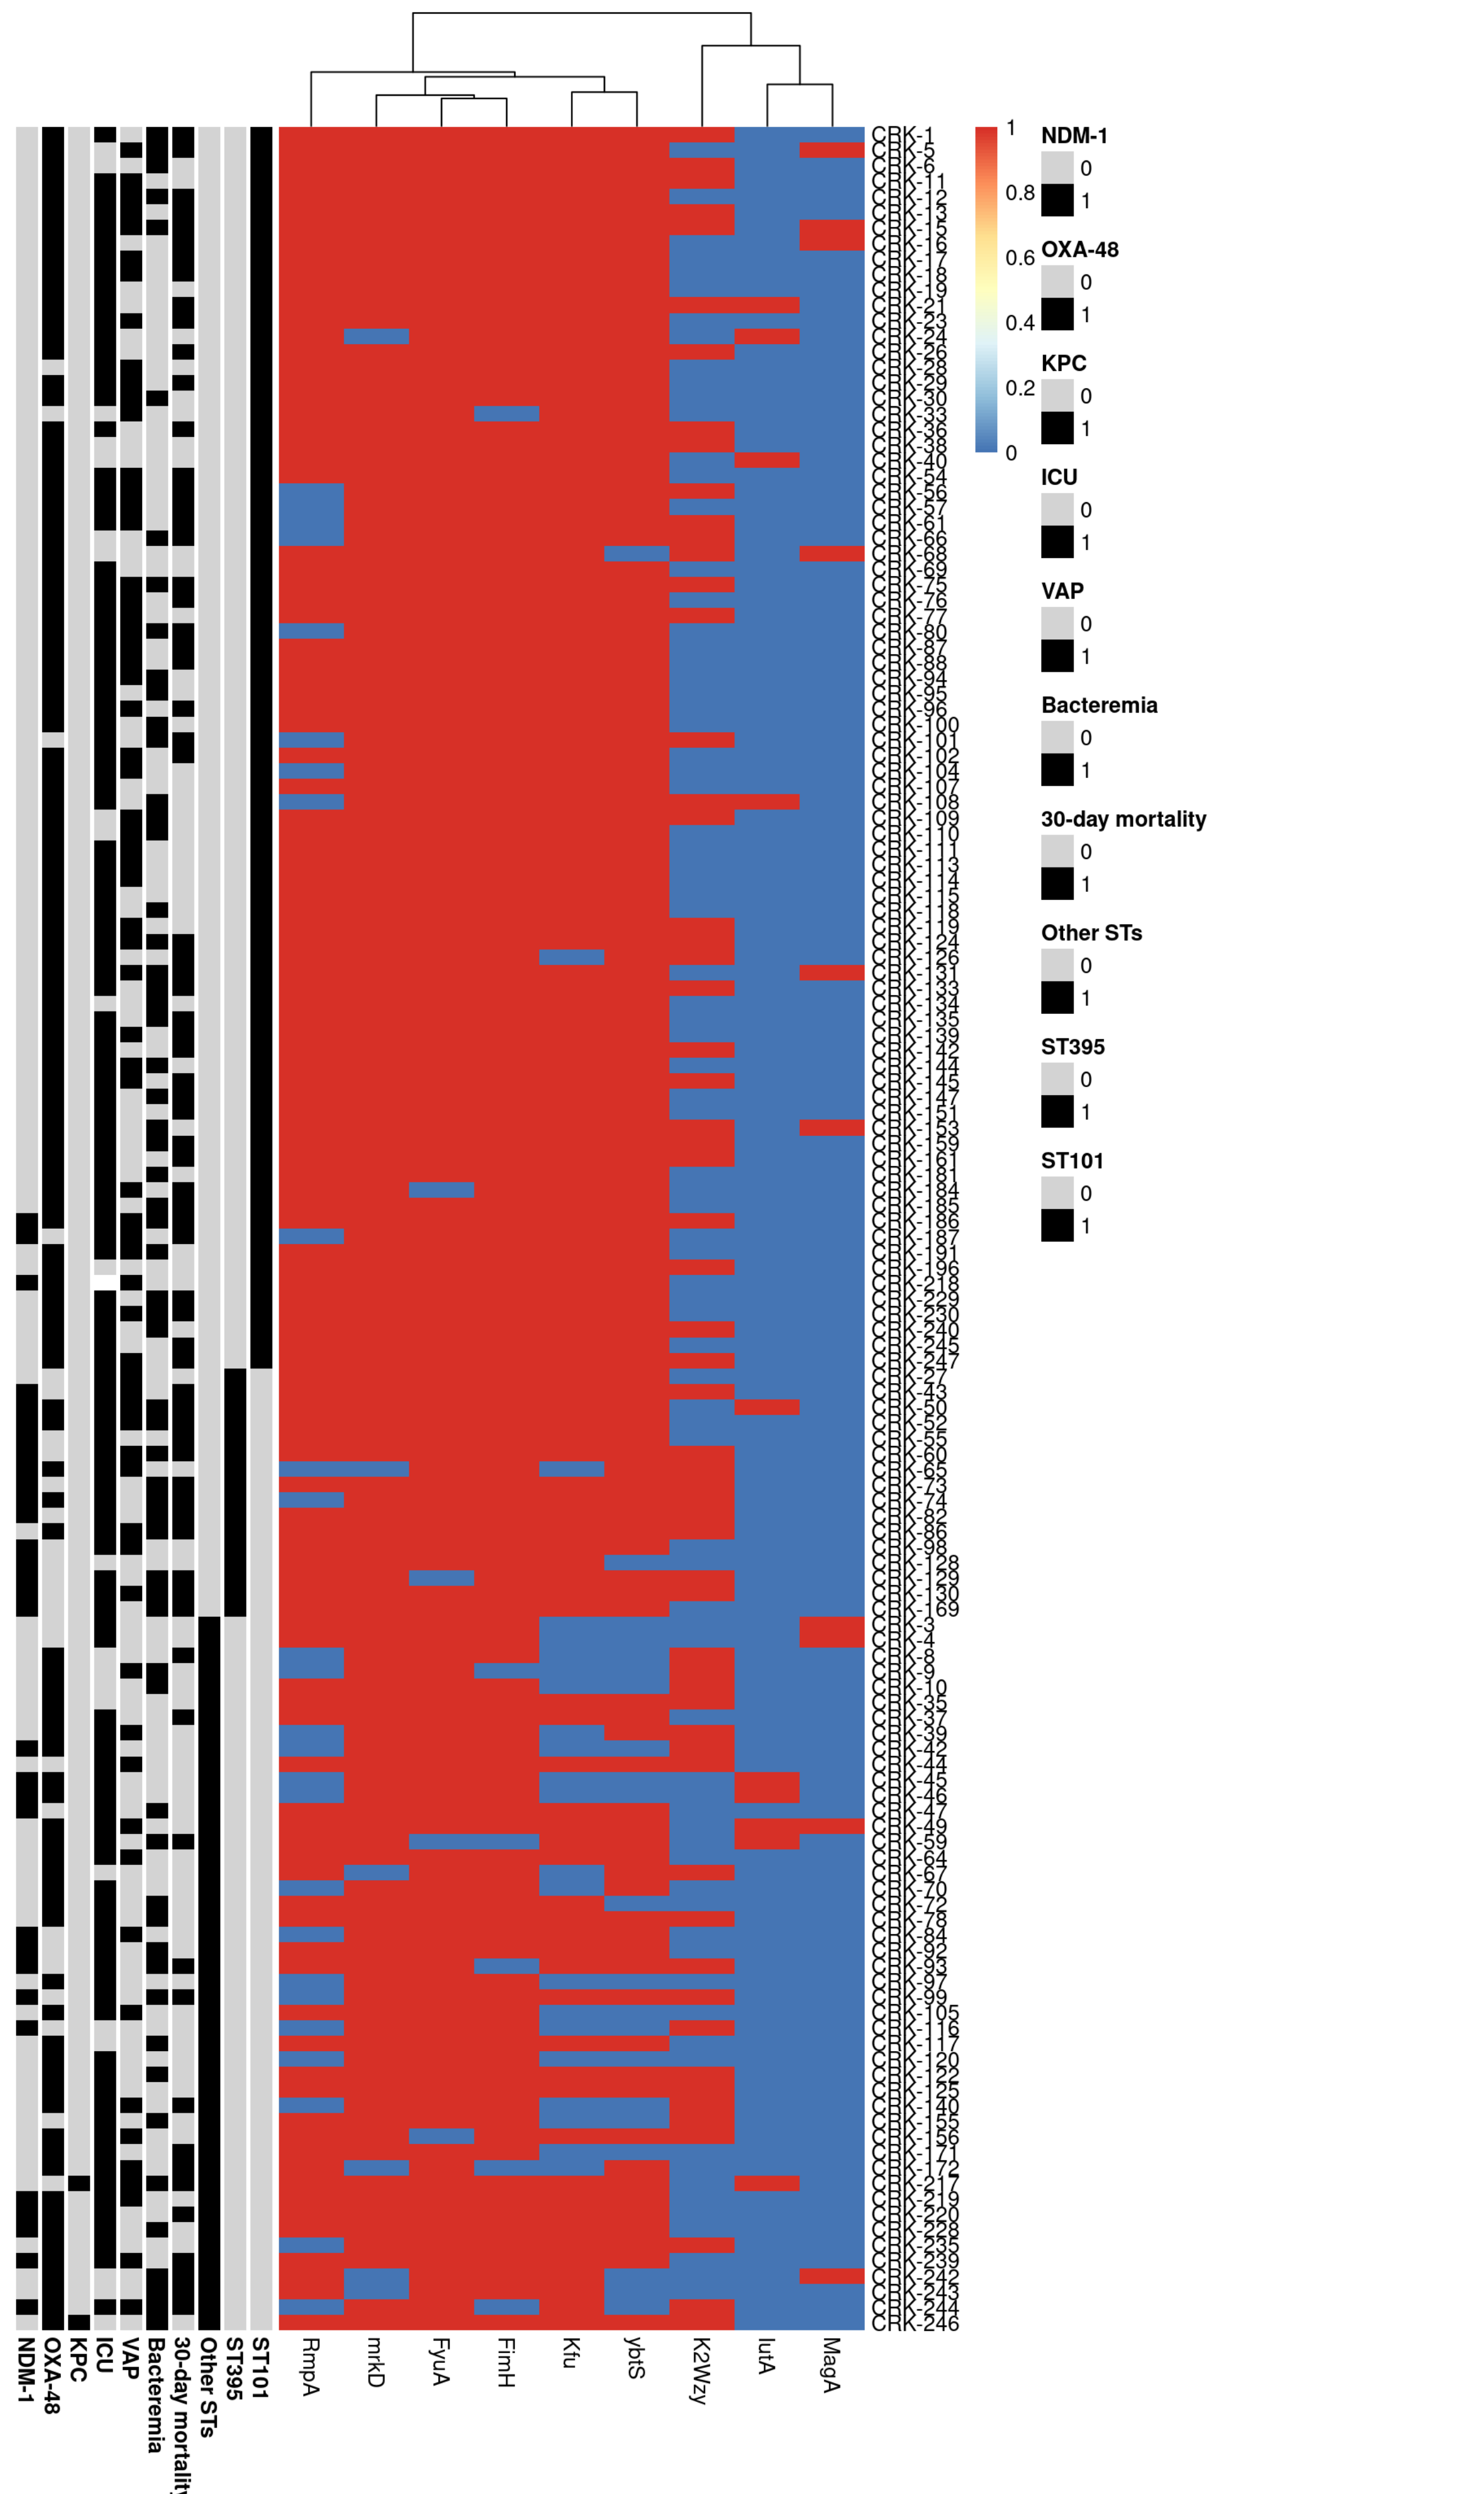

Minimum spanning tree

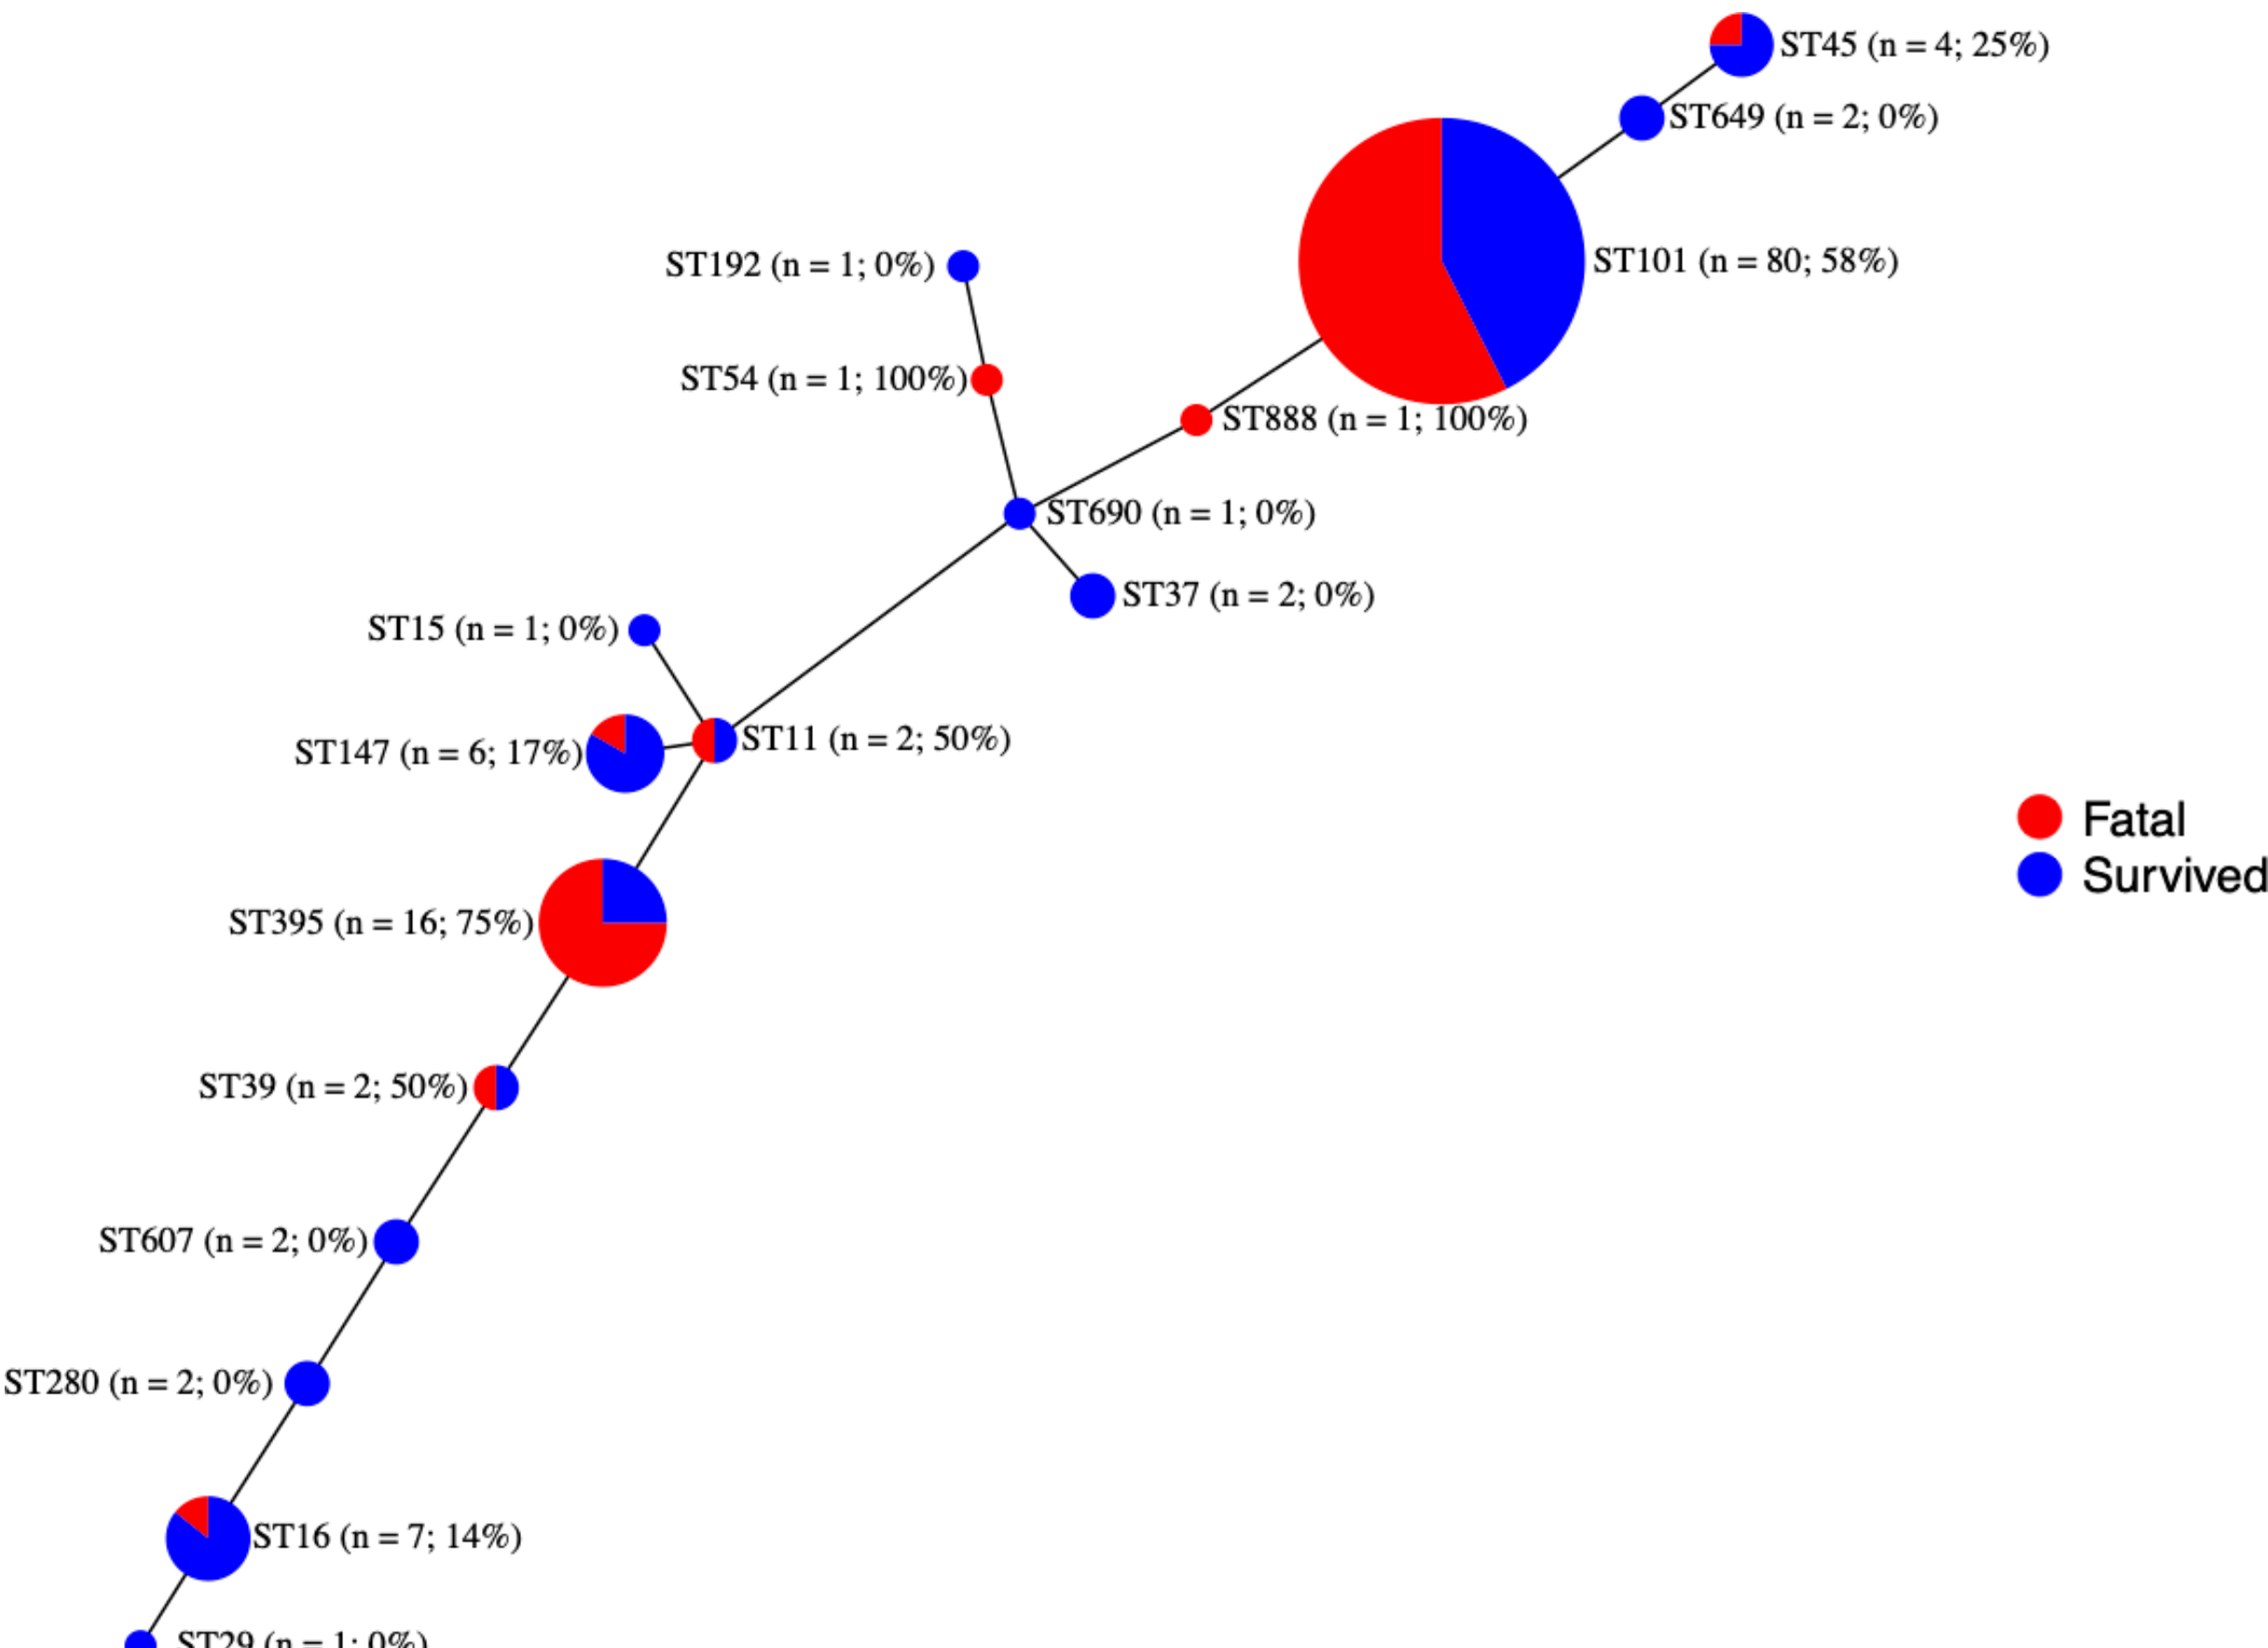

Fisher's exact test between 30-day mortality & other covariates

| ##            | OR     | CI            | p-value  |
|---------------|--------|---------------|----------|
| ## Bacteremia | " 1.6" | " 0.78-3.31"  | " 0.179" |
| ## FimH       | " 0.5" | " 0.04-3.64"  | " 0.681" |
| ## FyuA       | " 0.3" | " 0.01-4.30"  | " 0.620" |
| ## ICU        | " 4.3" | " 1.42-16.04" | " 0.005" |
| ## IutA       | " 0.6" | " 0.12-2.79"  | " 0.529" |
| ## K2Wzy      | " 1.3" | " 0.66-2.78"  | " 0.401" |
| ## Kfu        | " 3.9" | " 1.27-14.63" | " 0.009" |
| ## KPC        | " 1.0" | " 0.01-77.33" | " 1.000" |
| ## MagA       | " 1.0" | " 0.21-4.43"  | " 1.000" |
| ## mrkD       | " 1.0" | " 0.13-7.96"  | " 1.000" |
| ## NDM-1      | " 1.5" | " 0.61-3.58"  | " 0.419" |
| ## OXA-48     | " 1.0" | " 0.40-2.66"  | " 1.000" |
| ## RmpA       | " 1.2" | " 0.49-3.23"  | " 0.668" |
| ## ST101      | " 1.9" | " 0.91-3.88"  | " 0.090" |
| ## ST395      | " 3.3" | " 0.93-14.68" | " 0.061" |
| ## VAP        | " 1.8" | " 0.86-3.64"  | " 0.096" |
| ## ybtS       | " 3.0" | " 1.01-10.02" | " 0.034" |

Multivariate analysis to predict 30-day mortality status

| ##       | OR      | CI             | p-value  |
|----------|---------|----------------|----------|
| ## ICU   | " 7.9"  | " 1.43-55.98"  | " 0.024" |
| ## Kfu   | " 27.0" | " 5.67-179.65" | " 0.000" |
| ## ST101 | " 17.2" | " 2.45-350.40" | " 0.014" |
| ## ST395 | " 2.7"  | " 0.33-58.50"  | " 0.401" |
| ## VAP   | " 3.2"  | " 0.60-20.74"  | " 0.192" |
| ## ybtS  | " 0.7"  | " 0.13-3.17"   | " 0.624" |

Multivariate analysis to predict ST101 status

| ##                  | OR      | CI             | p-value  |
|---------------------|---------|----------------|----------|
| ## 30-day mortality | " 1.2"  | " 0.17-6.12"   | " 0.860" |
| ## FimH             | " 3.1"  | " 0.18-100.25" | " 0.464" |
| ## Kfu              | " 20.3" | " 2.17-484.56" | " 0.018" |
| ## Mortality        | " 3.4"  | " 0.71-22.83"  | " 0.156" |
| ## mrkD             | " 4.3"  | " 0.24-130.73" | " 0.331" |
| ## NDM-1            | " 0.0"  | " 0.01-0.15"   | " 0.000" |
| ## OXA-48           | " 5.0"  | " 1.04-26.48"  | " 0.045" |
| ## RmpA             | " 0.7"  | " 0.11-3.53"   | " 0.688" |
| ## VAP              | " 1.8"  | " 0.61-5.64"   | " 0.292" |
| ## ybtS             | " 9.9"  | " 1.08-228.71" | " 0.067" |

Multivariate analysis to predict ST395 status

| ##                  | OR            | CI            | p-value  |
|---------------------|---------------|---------------|----------|
| ## 30-day mortality | " 83887477.7" | " 0.00-NA"    | " 0.993" |
| ## Kfu              | " 0.6"        | " 0.05-17.86" | " 0.717" |
| ## Mortality        | " 0.0"        | " 0.00-Inf"   | " 0.993" |
| ## OXA-48           | " 0.0"        | " 0.01-0.15"  | " 0.000" |
| ## VAP              | " 1.9"        | " 0.52-8.08"  | " 0.336" |
| ## ybtS             | " 1.4"        | " 0.11-43.51" | " 0.808" |

Fisher's exact test between VAP & other covariates

| ##       | OR     | CI            | p-value  |
|----------|--------|---------------|----------|
| ## FimH  | " 0.4" | " 0.04-3.14"  | " 0.421" |
| ## Kfu   | " 2.5" | " 0.85-8.50"  | " 0.096" |
| ## RmpA  | " 1.1" | " 0.41-2.72"  | " 1.000" |
| ## ST101 | " 2.1" | " 1.00-4.33"  | " 0.042" |
| ## ST395 | " 1.5" | " 0.47-5.07"  | " 0.596" |
| ## ybtS  | " 4.6" | " 1.38-19.76" | " 0.008" |
